# Supplementary material for: Synergistic optimization of triple phase junctions and oxygen vacancies over MnxCd1−xS/Ov-WO3 for boosting photocatalytic hydrogen evolution
Source: Royal Society of Chemistry journal article supplement (doi:10.1039/d3dt04104b), 2024-01-01
Supplement: d3dt04104b1.pdf [file d3dt04104b1.pdf]

*Supporting information for:*

**Synergistic optimization of triple phase junctions and oxygen vacancies over  $\text{Mn}_x\text{Cd}_{1-x}\text{S}/\text{Ov-WO}_3$  for boosting photocatalytic hydrogen evolution**

Haitao Zhao <sup>a,\*</sup>, Hongjie Zhu <sup>a,\*</sup>, Min Wang <sup>a</sup>, Heyuan Liu <sup>b</sup>, Xiyu Li <sup>c,\*</sup>

<sup>a</sup> Shandong Provincial Key Laboratory of Chemical Energy Storage and Novel Cell Technology, School of Chemistry and Chemical Engineering, Liaocheng University, Liaocheng, 252059, China. \**E-mail: [zhaohaitao\\_2014@163.com](mailto:zhaohaitao_2014@163.com), [zhuhongjie@lcu.edu.cn](mailto:zhuhongjie@lcu.edu.cn)*

<sup>b</sup> College of New Energy, China University of Petroleum (East China), Qingdao, Shandong, 266580, China

<sup>c</sup> School of Materials Science and Engineering, China University of Petroleum (East China), Qingdao, Shandong, 266580, China. \* *E-mail: [xiyouli@upc.edu.cn](mailto:xiyouli@upc.edu.cn)*

### *Characterization of Materials*

X-ray diffraction (XRD) patterns of nanomaterials were recorded on a Rigaku Ultima IV diffractometer with Cu K $\alpha$  radiation ( $\lambda = 1.538 \text{ \AA}$ ). The morphologies of samples were investigated by field-emission scanning electron microscope (JEOL JSM-6700F) and transmission electron microscope (JEM 2100). X-ray photoelectron spectroscopy (XPS) measurements were measured on a Thermo Escalab 250 Xi with Mg K $\alpha$  as the excitation source. In situ XPS were performed under visible light irradiation. The UV/vis diffuse reflection spectra (DRS) were obtained on a Hitachi UV-3900 spectrophotometer with an integrated sphere attachment and BaSO<sub>4</sub> used as the reference. Steady-state fluorescence spectra, time resolved fluorescence spectra, and fluorescence quantum yields were measured with FLS980 (Edinburgh instrument Ltd, England). The absolute fluorescence quantum yields of all samples were obtained by using an integrating sphere and photoluminescence decay curves were measured on the single photon counting (TCSPC) mode. N<sub>2</sub> adsorption-desorption isotherms were measured at 77 K after heating the samples at 100°C for 5 h to remove any moisture and solvent molecules in the pore with a Beckman Coulter SA3100 analyzer. The Brunauer-Emmett-Teller (BET) method was utilized to calculate specific surface areas ( $S_{\text{BET}}$ ). By using the Barrett-Joyner-Halenda model, the pore size and volume distributions were derived from the adsorption branches of isotherms.

### *Photocatalytic H<sub>2</sub> production experiment*

The hydrogen evolution experiment was carried out in 250 mL quartz glass reaction flask containing 100 mL 0.25M Na<sub>2</sub>S/0.35 M Na<sub>2</sub>SO<sub>3</sub> solution and 10 mg photocatalyst. After 15 minutes of stirring, the air in the quartz bottle was completely removed by adding N<sub>2</sub> carrier gas. The reaction system was kept below 278 K by a cooling water bath. The reaction flask was placed in photocatalytic reaction system equipped with 300 Xe lamp (CEL-SPH2N) with UV-cutoff filter ( $\lambda \geq 420 \text{ nm}$ ) for hydrogen evolution reaction. The hydrogen production yield was detected through GC 7900 on-line gas chromatography with TCD detector. The active irradiation area of photoreactor is 16.5 cm<sup>2</sup>. The stability of the photocatalyst was tested by continuous

hydrogen evolution experiments over 12 hours.

The apparent quantum yield (AQY) of photocatalyst at different wavelengths was measured by using different band filters (420 nm, 450 nm, 520 nm, 600 nm). The apparent quantum yield is calculated by the following formula:

$$\begin{aligned} \text{AQY}[\%] &= \frac{\text{number of reacted electrons}}{\text{number of incident photons}} \times 100\% \\ &= \frac{2 \times \text{number of evolved } H_2 \text{ molecules}}{\text{number of incident photons}} \times 100\% \quad (1) \end{aligned}$$

### *Photoelectrochemical measurements*

The photoelectrochemical measurements were collected with Gamry Reference 600 workstation. The working electrode was prepared as follows: the 5 mg sample was dissolved in 2 mL ethanol solution with 10  $\mu\text{L}$  of Nafion solution, and then coated on FTO conductive glass of 1 cm  $\times$  1 cm. 0.50 mol $\cdot\text{L}^{-1}$   $\text{Na}_2\text{SO}_4$  solution (electrolyte solution), Pt sheet electrode (counter electrode), Ag/AgCl electrode (reference electrode) and working electrode formed a three-electrode system. EIS was tested in a range of 0.01-10<sup>5</sup> Hz frequency with an amplitude of 10 mV. And linear sweep voltammetry (LSV) test voltage ranges from -2.0 to 0.5 V and scan rate of 0.05 V/s.

### *Computational details*

Electronic structures of the t-MCS and Ov-WO<sub>3</sub> were investigated via the plane-wave-pseudopotential approach based on the density functional theory (DFT). Their electronic structures were calculated using the Cambridge serial total energy package (CASTEP) module. The Perdew-Burke-Ernzerhof (PBE) exchange-correlation functional was selected within the generalized gradient approximation (GGA). A cutoff energy of 450 eV was used. Through the BFGS-based method, the convergence tolerance for the energy change, force, maximum stress and maximum displacement tolerances were set at 1.0 $\times 10^{-5}$  eV/atom, 0.03 eV/ $\text{\AA}$ , 0.05 GPa, and 1.0 $\times 10^{-3}$   $\text{\AA}$ , respectively. After geometry optimization, all the optimized models were adopted to conduct the density of state (DOS) and the calculated work functions for t-MCS and Ov-WO<sub>3</sub> model.

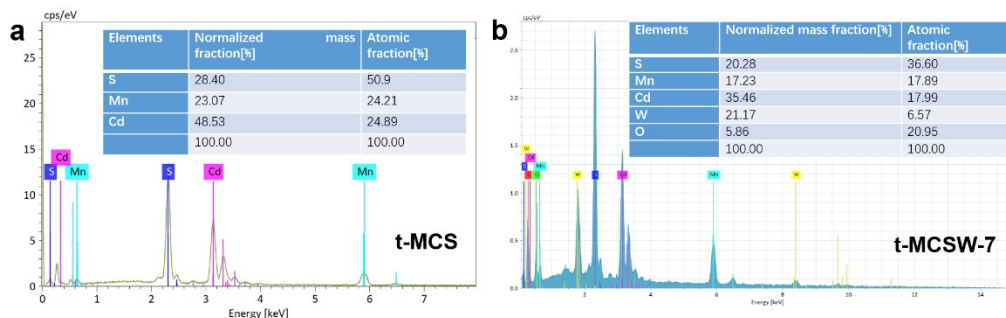

**Fig. S1** EDS spectra and elements contents for t-MCS (a), t-MCSW-7 (b).

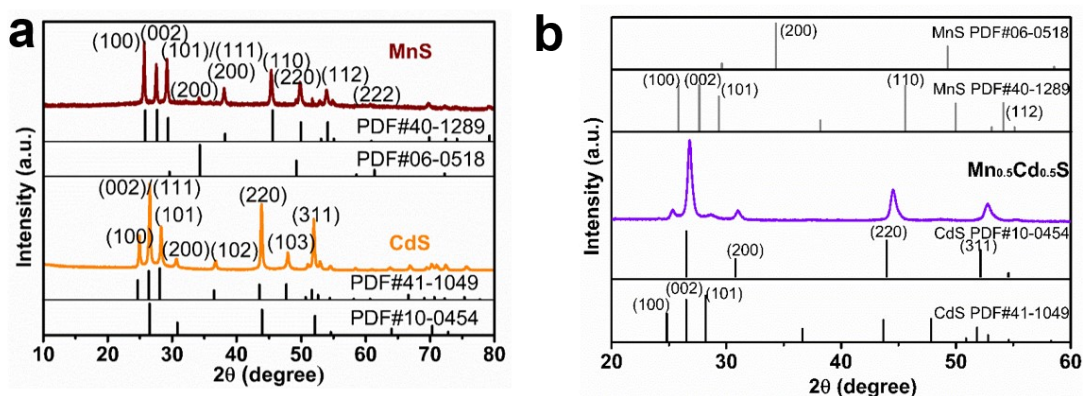

**Fig. S2** Typical powder XRD diffraction patterns of (a) CdS, MnS, (b) nanotwin  $\text{Mn}_{0.5}\text{Cd}_{0.5}\text{S}$ .

*Note:* The as-prepared CdS exhibits characteristic peaks at  $25.19^\circ$ ,  $26.83^\circ$ ,  $28.40^\circ$ ,  $30.50^\circ$ ,  $36.82^\circ$ ,  $43.87^\circ$ ,  $47.97^\circ$ , and  $52.28^\circ$ , which are in exact agreement with (100), (002), (101), (102), (220), (103) facets of the hexagonal CdS (PDF # 41-1049) and (111), (200), (220) and (311) facets of cubic CdS (PDF # 10-0454), confirming that the existence of mixed-phase CdS.<sup>41,42</sup> Further analysis was conducted to determine the phase composition the prepared MnS. The XRD pattern of MnS reveals peaks at  $2\theta$  values of  $25.60^\circ$ ,  $27.52^\circ$ ,  $29.30^\circ$ ,  $34.15^\circ$ ,  $38.46^\circ$ ,  $45.51^\circ$ ,  $49.89^\circ$ ,  $54.08^\circ$ , and  $61.52^\circ$ . These peaks demonstrate a remarkable alignment with the (100), (002), (101), (200), (110), and (112) crystal facets wurtzite MnS (PDF#40-1289) and (111), (200), (220) and (222) crystal planes cubic MnS (PDF#06-0518),<sup>18,19</sup> indicating that MnS is also a mixed phase.

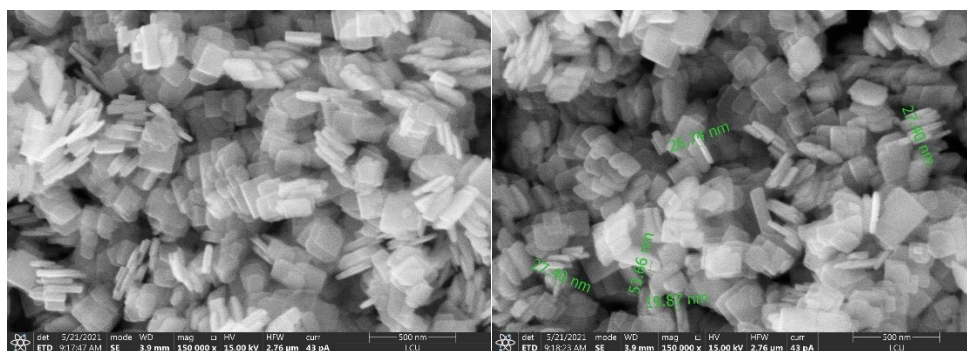

**Fig. S3** SEM images of Ov-WO<sub>3</sub> nanosheets

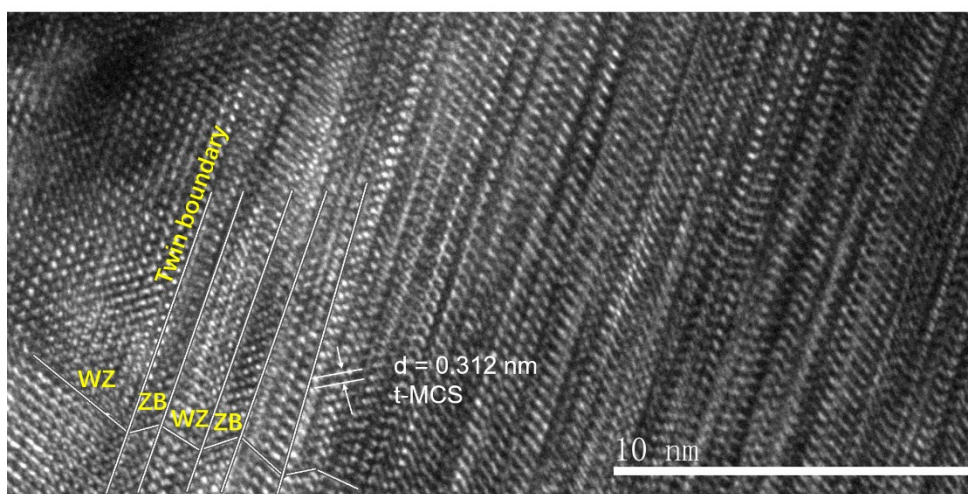

**Fig. S4** HRTEM image of t-MCS.

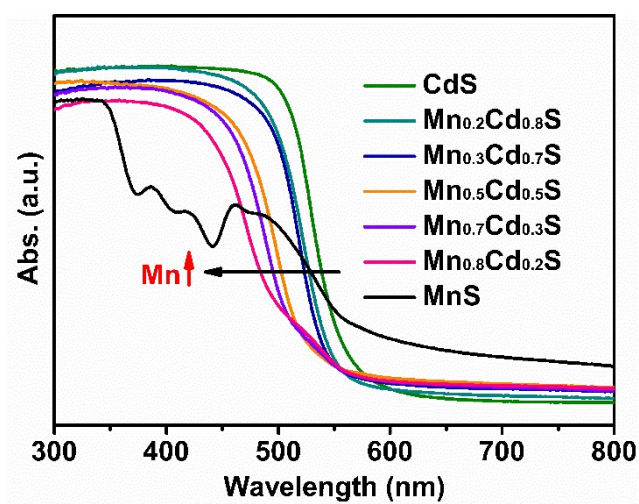

**Fig. S5** UV-Vis DRS of nanotwin Mn<sub>x</sub>Cd<sub>1-x</sub>S samples.

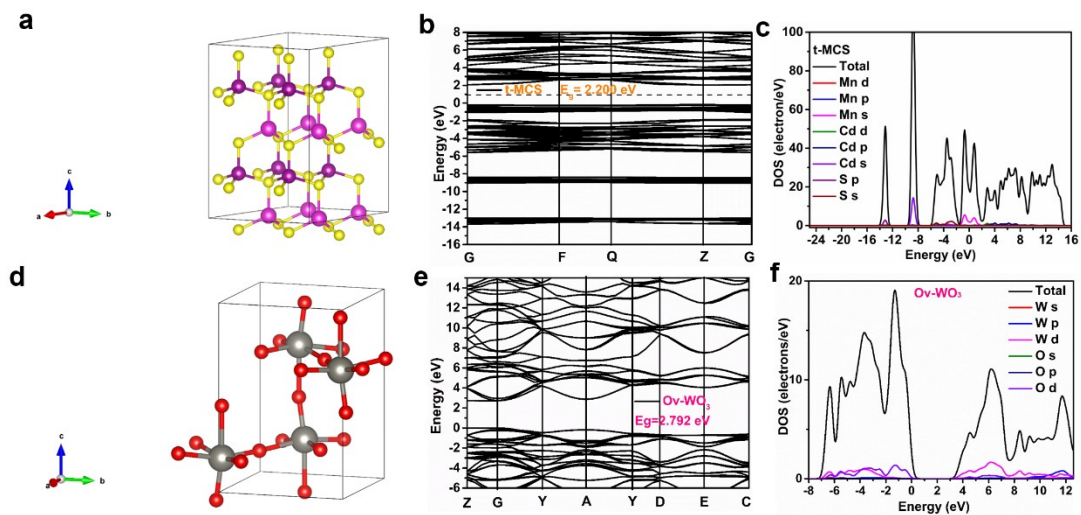

**Fig. S6** Optimized geometric structure, band structure and density of states of t-MCS (002) (a, b, c), Ov-WO<sub>3</sub> (200) (d, e, f).

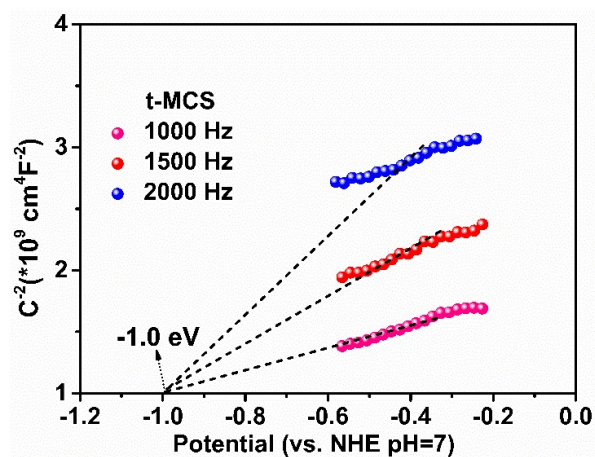

**Fig. S7** The Mott-Schottky plots of t-MCS with different frequency.

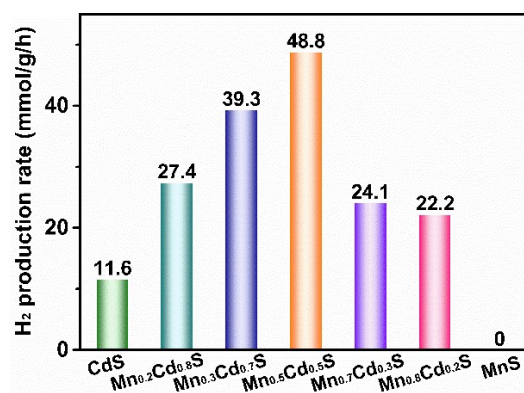

**Fig. S8** The hydrogen evolution rate of nanotwin Mn<sub>x</sub>Cd<sub>1-x</sub>S samples.

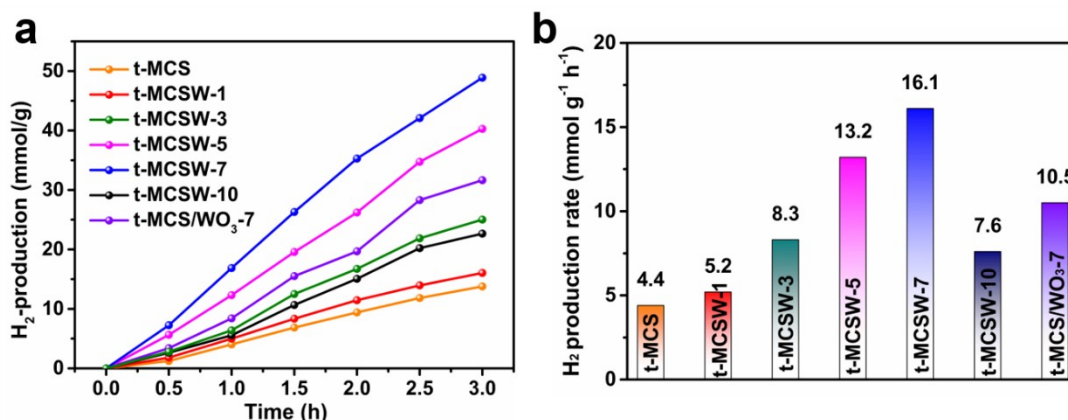

**Fig. S9** The amount of hydrogen evolution (a) and hydrogen evolution rate (b) of t-MCS-x under  $\lambda > 510$  nm irradiation.

**Table S1** BET specific surface area, and BJH average pore diameter parameters of Ov-WO<sub>3</sub>, WO<sub>3</sub>, t-MCS and t-MCSW-7.

| Samples            | S <sub>BET</sub> (m <sup>2</sup> /g) | Ave pore size (nm) |
|--------------------|--------------------------------------|--------------------|
| Ov-WO <sub>3</sub> | 34.62                                | 25.5               |
| WO <sub>3</sub>    | 11.95                                | 32.5               |
| t-MCS              | 6.87                                 | 29.4               |
| t-MCSW-7           | 18.40                                | 30.1               |

**Table S2** Comparison of photocatalytic hydrogen evolution activity over Mn<sub>x</sub>Cd<sub>1-x</sub>S-based catalysts.

| Photocatalysts                                                   | Mass (mg) | Light source                           | Sacrificial agents                                                                         | PHE (mmo g <sup>-1</sup> h <sup>-1</sup> ) | H <sub>2</sub> rate (mmol h <sup>-1</sup> ) |
|------------------------------------------------------------------|-----------|----------------------------------------|--------------------------------------------------------------------------------------------|--------------------------------------------|---------------------------------------------|
| t-MCSW-7 In this work                                            | 10        | 300 W Xe lamp ( $\lambda > 420$ nm)    | 100 ml H <sub>2</sub> O<br>0.35 M Na <sub>2</sub> S/0.25 M Na <sub>2</sub> SO <sub>3</sub> | 194.1                                      | 1.941                                       |
| Mn <sub>0.5</sub> Cd <sub>0.5</sub> S twin [1]                   | 5         | 300 W Xe lamp ( $\lambda > 400$ nm)    | 100 ml H <sub>2</sub> O<br>0.5 M Na <sub>2</sub> S/0.5 M Na <sub>2</sub> SO <sub>3</sub>   | 16.48                                      | 0.082                                       |
| NiCo <sub>2</sub> S <sub>4</sub> /T-MCS [2]                      | 10        | 300 W Xe lamp ( $\lambda \geq 420$ nm) | 100 ml H <sub>2</sub> O<br>0.35 M Na <sub>2</sub> S/0.25 M Na <sub>2</sub> SO <sub>3</sub> | 127.3                                      | 1.273                                       |
| NiS <sub>x</sub> /T-MCS [3]                                      | 10        | 300 W Xe lamp ( $\lambda \geq 420$ nm) | 100 ml H <sub>2</sub> O<br>0.35 M Na <sub>2</sub> S/0.25 M Na <sub>2</sub> SO <sub>3</sub> | 111.5                                      | 1.115                                       |
| 2MoO <sub>2</sub> /3Au/Mn <sub>0.5</sub> Cd <sub>0.5</sub> S [4] | 50        | 300 W Xe lamp                          | 100 ml H <sub>2</sub> O<br>0.1 M Na <sub>2</sub> S/0.3 M Na <sub>2</sub> SO <sub>3</sub>   | 12.77                                      | 0.638                                       |
| Fe <sub>2</sub> P/P-Mn <sub>0.5</sub> Cd <sub>0.5</sub> S [5]    | 30        | 300 W Xe lamp ( $\lambda \geq 400$ nm) | 40 ml H <sub>2</sub> O, Lactic acid (5 ml)                                                 | 2.94                                       | 0.088                                       |

|                                                                                 |    |                                        |                                                                                               |       |       |
|---------------------------------------------------------------------------------|----|----------------------------------------|-----------------------------------------------------------------------------------------------|-------|-------|
| CoP/Mn <sub>0.5</sub> Cd <sub>0.5</sub> S [6]                                   | 10 | 300 W Xe lamp ( $\lambda \geq 420$ nm) | 20 ml H <sub>2</sub> O, Lactic acid (8 ml)                                                    | 42.95 | 0.429 |
| g-C <sub>3</sub> N <sub>4</sub> /Mn <sub>0.8</sub> Cd <sub>0.2</sub> S [7]      | 50 | 300 W Xe lamp ( $\lambda > 420$ nm)    | 100 ml H <sub>2</sub> O<br>0.1 M Na <sub>2</sub> S/0.5 M Na <sub>2</sub> SO <sub>3</sub>      | 4     | 0.2   |
| colloidal Mn <sub>0.5</sub> Cd <sub>0.5</sub> S [8]                             | 10 | $\lambda > 400$ nm                     | 80 ml H <sub>2</sub> O<br>0.75 M Na <sub>2</sub> S/1.05 M Na <sub>2</sub> SO <sub>3</sub>     | 26    | 0.26  |
| Mn <sub>0.25</sub> Cd <sub>0.75</sub> S/NiCo <sub>2</sub> O <sub>4</sub> [9]    | 40 | 300 W Xe lamp                          | 90 ml H <sub>2</sub> O, Lactic acid (10 ml)                                                   | 61.16 | 2.446 |
| Cu-MOFs/Mn <sub>0.5</sub> Cd <sub>0.5</sub> S [10]                              | 10 | 5W LED                                 | 30 ml H <sub>2</sub> O<br>0.35 M Na <sub>2</sub> S/0.25 M Na <sub>2</sub> SO <sub>3</sub>     | 10.95 | 0.109 |
| Co <sub>x</sub> P/Mn <sub>0.35</sub> Cd <sub>0.65</sub> S [11]                  | 40 | 300 W Xe lamp ( $\lambda \geq 420$ nm) | 60 ml H <sub>2</sub> O<br>0.35 M Na <sub>2</sub> S/0.25 M Na <sub>2</sub> SO <sub>3</sub>     | 7.189 | 0.287 |
| MoS <sub>2</sub> /Mn <sub>0.25</sub> Cd <sub>0.75</sub> S [12]                  | 50 | 300 W Xe lamp ( $\lambda \geq 420$ nm) | 30 ml H <sub>2</sub> O<br>0.5 M Na <sub>2</sub> S/0.5 M Na <sub>2</sub> SO <sub>3</sub>       | 12.47 | 0.624 |
| Ni(OH) <sub>2</sub> /Mn <sub>0.3</sub> Cd <sub>0.7</sub> S [13]                 | 5  | 300 W Xe lamp ( $\lambda \geq 420$ nm) | 50 ml H <sub>2</sub> O<br>0.25 M Na <sub>2</sub> S/0.35 M Na <sub>2</sub> SO <sub>3</sub>     | 71.09 | 0.355 |
| NiSe/Mn <sub>0.5</sub> Cd <sub>0.5</sub> S [14]                                 | 5  | 300 W Xe lamp ( $\lambda \geq 420$ nm) | 50 ml H <sub>2</sub> O 0.0175 M<br>Na <sub>2</sub> S/0.0125 M Na <sub>2</sub> SO <sub>3</sub> | 28.08 | 0.140 |
| Cu <sub>2-x</sub> S/Mn <sub>0.5</sub> Cd <sub>0.5</sub> S/MoS <sub>2</sub> [15] | 50 | 300 W Xe lamp ( $\lambda \geq 420$ nm) | 100ml H <sub>2</sub> O<br>0.35 M Na <sub>2</sub> S/0.25 M Na <sub>2</sub> SO <sub>3</sub>     | 13.75 | 0.688 |

The average fluorescence lifetime ( $\tau_{ave}$ ) can be calculated using the equation:

$$\tau_{ave} = (A_1\tau_1^2 + A_2\tau_2^2)/(A_1\tau_1 + A_2\tau_2) \tag{S1}$$

**Table S3** Lifetime constant  $\tau_i$  and quantum yield  $\Phi$  of t-MCS, Ov-WO<sub>3</sub>, and t-MCSW-7.

| Samples            | $\tau$ (ns)                | $\tau_{ave}$ (ns) | $\chi^2$ | $\Phi$ (%) |
|--------------------|----------------------------|-------------------|----------|------------|
| t-MCS              | $\tau_1 = 0.7260$ (44.70%) | 7.806             | 1.320    | 1.33%      |
|                    | $\tau_2 = 8.3072$ (55.30%) |                   |          |            |
| Ov-WO <sub>3</sub> | $\tau_1 = 0.7426$ (48.27%) | 8.226             | 1.255    | 0.38%      |
|                    | $\tau_2 = 8.8142$ (51.73%) |                   |          |            |
| t-MCSW-7           | $\tau_1 = 0.6748$ (38.11%) | 8.879             | 1.296    | 0.31%      |
|                    | $\tau_2 = 9.2484$ (61.89%) |                   |          |            |

### References

[1] H. Huang, Z. Wang, B. Luo, P. Chen, T. Lin, M. Xiao, S. Wang, B. Dai, W. Wang, J. Kou, C. Lu, Z. Xu, L. Wang, Design of twin junction with solid solution interface for

- efficient photocatalytic H<sub>2</sub> production, *Nano Energy*, 2020, 69, 104410-104419.
- [2] C. Wang, X. Ma, Z. Fu, X. Hu, J. Fan, E. Liu, Highly efficient photocatalytic H<sub>2</sub> evolution over NiCo<sub>2</sub>S<sub>4</sub>/Mn<sub>0.5</sub>Cd<sub>0.5</sub>S: Bulk twinned homojunctions and interfacial heterojunctions, *Journal of Colloid and Interface Science*, 2021, 592, 66-76.
- [3] Z. Wang, M. Li, J. Li, Y. Ma, J. Fan, E. Liu, NiS<sub>x</sub> modified Mn<sub>0.5</sub>Cd<sub>0.5</sub>S twinned homojunctions for efficient photocatalytic hydrogen evolution, *Journal of Environmental Chemical Engineering*, 2022, 10, 107375-107384.
- [4] Y. Liu, L. Wang, H. Lv, X. Wu, X. Xing, S. Song, Constructing robust MoO<sub>2</sub>/Au/Mn<sub>0.5</sub>Cd<sub>0.5</sub>S multiple heterojunctions for improved photocatalytic hydrogen evolution: An insight into the synergetic effect of MoO<sub>2</sub> and Au cocatalysts, *Applied Surface Science*, 2021, 541, 148582-148592.
- [5] Y. Liu, J. Yan, D. Liu, L. Shi, The highly efficient photocatalytic hydrogen evolution of Mn<sub>0.5</sub>Cd<sub>0.5</sub>S by synergistic effect of Fe<sub>2</sub>P and P doping, *Journal of Alloys and Compounds*, 2023, 938, 168545-168554.
- [6] M. Xiong, Y. Qin, B. Chai, J. Yan, G. Fan, F. Xu, C. Wang, G. Song, Unveiling the role of Mn-Cd-S solid solution and MnS in Mn<sub>x</sub>Cd<sub>1-x</sub>S photocatalysts and decorating with CoP nanoplates for enhanced photocatalytic H<sub>2</sub> evolution, *Chemical Engineering Journal*, 2022, 428, 131069-131079 .
- [7] H. Liu, Z. Xu, Z. Zhang, D. Ao, Novel visible-light driven Mn<sub>0.8</sub>Cd<sub>0.2</sub>S/g-C<sub>3</sub>N<sub>4</sub> composites: Preparation and efficient photocatalytic hydrogen production from water without noble metals, *Applied Catalysis A: General*, 2016, 518, 150-157.
- [8] L. Li, G. Liu, S. Qi, X. Liu, L. Gu, Y. Lou, J. Chen, Y. Zhao, Highly efficient colloidal Mn<sub>x</sub>Cd<sub>1-x</sub>S nanorod solid solution for photocatalytic hydrogen generation, *Journal of Materials Chemistry A*, 2018, 6, 23683-23689.
- [9] T. Feng, H. Li, R. Gao, G. Su, W. Wang, B. Dong, L. Cao, Manganese Cadmium Sulfide Nanoparticles Solid Solution on Cobalt Acid Nickel Nanoflakes: A Robust Photocatalyst for Hydrogen Evolution, *ChemSusChem*, 2022, 15, 202200288-202200298.
- [10] Y. Cao, G. Wang, H. Liu, Y. Li, Z. Jin, Q. Ma, Regular octahedron Cu-MOFs modifies Mn<sub>0.05</sub>Cd<sub>0.95</sub>S nanoparticles to form a S-scheme heterojunction for

photocatalytic hydrogen evolution, *International Journal of Hydrogen Energy*, 2021, 46, 7230-7240.

[11] X. He, D. Zeng, Y. Liu, Q. Chen, J. Yang, R. Gao, T. Fujita, Y. Wei, Porous  $\text{Co}_x\text{P}$  nanosheets decorated  $\text{Mn}_{0.35}\text{Cd}_{0.65}\text{S}$  nanoparticles for highly enhanced noble-metal-free photocatalytic  $\text{H}_2$  generation, *Journal of Colloid and Interface Science*, 2022, 625, 859-870.

[12] Q.-Z. Huang, Y. Xiong, Q. Zhang, H.-C. Yao, Z.-J. Li, Noble metal-free  $\text{MoS}_2$  modified  $\text{Mn}_{0.25}\text{Cd}_{0.75}\text{S}$  for highly efficient visible-light driven photocatalytic  $\text{H}_2$  evolution, *Applied Catalysis B: Environmental*, 2017, 209, 514-522.

[13] J. Zhang, C. Cheng, F. Xing, C. Chen, C. Huang, 0D  $\beta\text{-Ni}(\text{OH})_2$  nanoparticles/1D  $\text{Mn}_{0.3}\text{Cd}_{0.7}\text{S}$  nanorods with rich S vacancies for improved photocatalytic  $\text{H}_2$  production, *Chemical Engineering Journal*, 2021, 414, 129157-129163.

[14] X. Jiang, H. Gong, Q. Liu, M. Song, C. Huang, In situ construction of  $\text{NiSe}/\text{Mn}_{0.5}\text{Cd}_{0.5}\text{S}$  composites for enhanced photocatalytic hydrogen production under visible light, *Applied Catalysis B: Environmental*, 2020, 268, 118439-118449 .

[15] X. Liu, Q. Liu, P. Wang, Y. Liu, B. Huang, E.A. Rozhkova, Q. Zhang, Z. Wang, Y. Dai, J. Lu, Efficient photocatalytic  $\text{H}_2$  production via rational design of synergistic spatially-separated dual cocatalysts modified  $\text{Mn}_{0.5}\text{Cd}_{0.5}\text{S}$  photocatalyst under visible light irradiation, *Chemical Engineering Journal*, 2018, 337, 480-487.
